# Supplementary material for: Simultaneous Occurrence of Multiple Neoplasms in Children with Cancer Predisposition Syndromes: Collaborating with Abnormal Genes
Source: MDPI journal article supplement (doi:10.3390/genes14091670), 2023-08-24
Supplement: s1 [file s1]

Table S1. A detailed list of genes in the NGS oncology panel.

|               |                |                |                |               |
|---------------|----------------|----------------|----------------|---------------|
| <i>AIP</i>    | <i>ALK</i>     | <i>ANKRD26</i> | <i>APC</i>     | <i>ATM</i>    |
| <i>AXIN2</i>  | <i>BAP1</i>    | <i>BARD1</i>   | <i>BLM</i>     | <i>BRAF</i>   |
| <i>BRCA1</i>  | <i>BRCA2</i>   | <i>BRIP1</i>   | <i>CBL</i>     | <i>CD70</i>   |
| <i>CDC73</i>  | <i>CDH1</i>    | <i>CDK4</i>    | <i>CDKN1B</i>  | <i>CDKN1C</i> |
| <i>DDB2</i>   | <i>DDX41</i>   | <i>DICER1</i>  | <i>DKC1</i>    | <i>EGFR</i>   |
| <i>ELANE</i>  | <i>EPCAM</i>   | <i>ERCC1</i>   | <i>ERCC2</i>   | <i>ERCC3</i>  |
| <i>ERCC4</i>  | <i>ERCC5</i>   | <i>ETV6</i>    | <i>EXQ1</i>    | <i>EXT1</i>   |
| <i>EXT2</i>   | <i>E2H2</i>    | <i>FANCA</i>   | <i>FANCB</i>   | <i>FANCC</i>  |
| <i>FANCD2</i> | <i>FANCE</i>   | <i>FANCF</i>   | <i>FANCG</i>   | <i>FANCI</i>  |
| <i>FANCL</i>  | <i>FANCM</i>   | <i>FH</i>      | <i>FLCN</i>    | <i>GATA2</i>  |
| <i>GPC3</i>   | <i>GREM1</i>   | <i>HNF1A</i>   | <i>HRAS</i>    | <i>IKZF1</i>  |
| <i>KIT</i>    | <i>KRAS</i>    | <i>LZTR1</i>   | <i>MAP2K1</i>  | <i>MAP2K2</i> |
| <i>MAX</i>    | <i>MEN1</i>    | <i>MET</i>     | <i>MITF</i>    | <i>MLH1</i>   |
| <i>MLH3</i>   | <i>MRE11A</i>  | <i>MSH2</i>    | <i>MSH6</i>    | <i>MUTYH</i>  |
| <i>NBN</i>    | <i>NF1</i>     | <i>NF2</i>     | <i>NRAS</i>    | <i>NSD1</i>   |
| <i>NSUN2</i>  | <i>NTHL1</i>   | <i>PALB2</i>   | <i>PAX5</i>    | <i>PDGFRA</i> |
| <i>PHOX2B</i> | <i>PMS1</i>    | <i>PMS2</i>    | <i>POLD1</i>   | <i>POLE</i>   |
| <i>POT1</i>   | <i>PPM1D</i>   | <i>PRF1</i>    | <i>PRKAR1A</i> | <i>PTCH1</i>  |
| <i>PTEN</i>   | <i>PTPN11</i>  | <i>RAD50</i>   | <i>RAD51C</i>  | <i>RAF1</i>   |
| <i>RET</i>    | <i>RIT1</i>    | <i>RUNX1</i>   | <i>SDHA</i>    | <i>SDHAF2</i> |
| <i>SDHB</i>   | <i>SDHC</i>    | <i>SDHD</i>    | <i>SHOC2</i>   | <i>SLX4</i>   |
| <i>SMAD4</i>  | <i>SMARCA4</i> | <i>SMARCB1</i> | <i>SOS1</i>    | <i>SOS2</i>   |
| <i>SPRED1</i> | <i>STK11</i>   | <i>SUFU</i>    | <i>TERC</i>    | <i>TERT</i>   |
| <i>TINF2</i>  | <i>TMEM127</i> | <i>TP53</i>    | <i>TSC1</i>    | <i>TSC2</i>   |
| <i>VHL</i>    | <i>WT1</i>     | <i>XPA</i>     | <i>XPC</i>     | <i>XRCC2</i>  |
